# Supplementary material for: Molybdate transporter ModABC is important for Pseudomonas aeruginosa chronic lung infection
Source: PubMed Central journal article supplement (PMC4710039; doi:10.1186/s13104-016-1840-x), 2016-01-12
Supplement: 13104_2016_1840_MOESM1_ESM.pdf [file 13104_2016_1840_MOESM1_ESM.pdf]

**Table S1. Primers used for sequencing of the insertion site, complementation and sequencing of the vector for complementation.**

| <b>Primer</b> | <b>Relevant sequence (5'-3')</b>                         | <b>Use</b>                                                                        |
|---------------|----------------------------------------------------------|-----------------------------------------------------------------------------------|
| PA1863_R      | CGT ACT GTC GAG TGG CAA C                                | Sequencing of tn5 insertion site                                                  |
| putKana2      | CGTACTGTCGAGTGGCAACG                                     | (Same as above)                                                                   |
| pUCP19-1      | AGT GAA TTC GAC CTC GGT ACG<br>GCA TCC GGC CCT GCG TTT C | Complementation: cloning of <i>modABC</i> into pUCP19 using Gibson assembly       |
| pUCP19-2      | GCC AAG CTT GCA TGC CTG CAG<br>AGA TCA TGC GCG GCG CG    | (Same as above)                                                                   |
| modABC-1      | GCG AGA AAC CGC TGG AGG CTG<br>CCG CGA C                 | (Same as above)                                                                   |
| modABC-2      | AGC CTC CAG CGG TTT CTC GCC<br>GAT CGC C                 | (Same as above)                                                                   |
| Insert1       | AGG GTC AGC AGG CCG TAG                                  | Complementation: double-strand sequencing of the <i>modABC</i> insert into pUCP19 |
| Insert1-rev   | CTA CGG CCT GCT GAC CCT                                  | (Same as above)                                                                   |
| Insert2       | GAT ACA GCG CAG GGC A AGT G                              | (Same as above)                                                                   |
| Insert2-rev   | CAC TTG CCT GCG CTG TAT C                                | (Same as above)                                                                   |
| Insert3       | AGC AGG TAG AAG CCG ATC AC                               | (Same as above)                                                                   |
| Insert3-rev   | GTG ATC GGC TTC TAC CTG CT                               | (Same as above)                                                                   |
| Insert4       | AGA GGA ACA CCT GGA ACG G                                | (Same as above)                                                                   |
| Insert4-rev   | CCG TTC CAG GTG TTC CTC T                                | (Same as above)                                                                   |
